# Supplementary material for: Transposon insertion causes cadherin mis-splicing and confers resistance to Bt cotton in pink bollworm from China
Source: PubMed Central journal article supplement (PMC6522560; doi:10.1038/s41598-019-43889-x), 2019-05-16
Supplement: 41598_2019_43889_MOESM1_ESM.pdf [file 41598_2019_43889_MOESM1_ESM.pdf]

**Transposon insertion causes cadherin mis-splicing and confers  
resistance to Bt cotton in pink bollworm from China**

**Supplementary Figures S1-S8**

Ling Wang<sup>1,2</sup>, Jintao Wang<sup>1,3</sup>, Yuemin Ma<sup>4</sup>, Peng Wan<sup>1</sup>, Kaiyu Liu<sup>4</sup>, Shengbo Cong<sup>1</sup>,  
Yutao Xiao<sup>5</sup>, Dong Xu<sup>1</sup>, Kongming Wu<sup>2\*</sup>, Jeffrey A. Fabrick<sup>6</sup>, Xianchun Li<sup>7</sup> & Bruce  
E. Tabashnik<sup>7</sup>

<sup>1</sup>Key Laboratory of Integrated Pest Management On Crops in Central China, Ministry of Agriculture, Hubei Key Laboratory of Crop Disease, Insect Pests and Weeds Control, Institute of Plant Protection and Soil Fertility, Hubei Academy of Agricultural Sciences, Wuhan 430064, China. <sup>2</sup>State Key Laboratory for Biology of Plant Diseases and Insect Pests, Institute of Plant Protection, Chinese Academy of Agricultural Sciences, Beijing 100193, China. <sup>3</sup>Hubei Insect Resources Utilization and Sustainable Pest Management Key Laboratory, Huazhong Agricultural University, Wuhan 430070, China. <sup>4</sup>School of Life Science, Central China Normal University, Wuhan, 430079, China. <sup>5</sup>Agricultural Genomics Institute at Shenzhen, Chinese Academy of Agricultural Sciences, Shenzhen, 518120, China. <sup>6</sup>USDA, ARS, U.S. Arid Land Agricultural Research Center, Maricopa, Arizona 85138, USA. <sup>7</sup>Department of Entomology, University of Arizona, Tucson, Arizona 85721, USA.

\* Correspondence and requests for materials should be addressed to K.W. (E-mail address: [kmwu@ippcaas.cn](mailto:kmwu@ippcaas.cn))

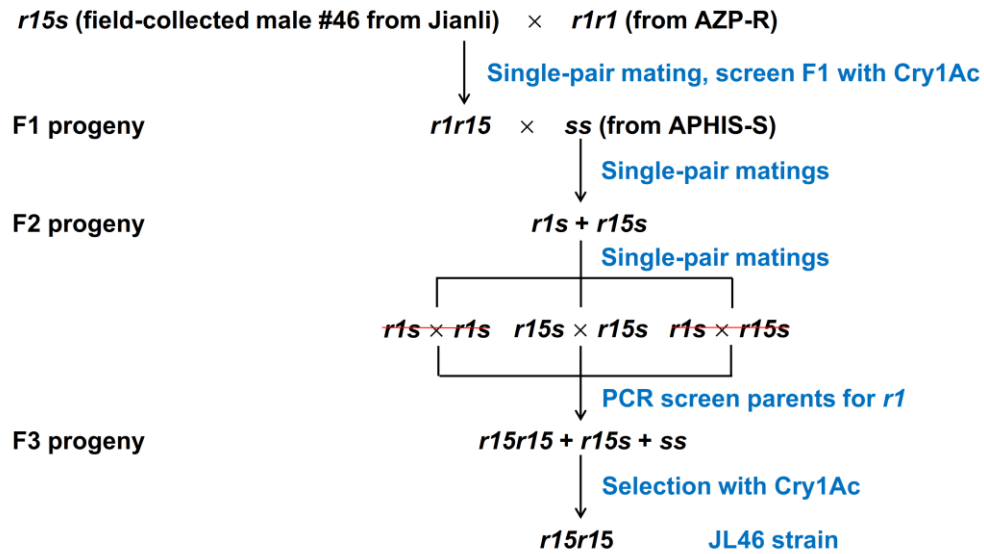

**Figure S1.** Isolation of pink bollworm resistant strain JL46. Pink bollworm strain JL46 was started from a single-pair cross between a field-collected male (#46) from Jianli in Hubei province of the Yangtze River Valley and a female from a Cry1Ac-resistant strain AZP-R (cadherin genotype  $r1r1$ ) from Arizona. Their F<sub>1</sub> progeny (family #46) were screened with 10  $\mu$ g Cry1Ac protoxin per ml diet, a diagnostic concentration of Cry1Ac. Survival of the F<sub>1</sub> progeny at the diagnostic concentration was 47% and recessive resistance to Cry1Ac of pink bollworm was described before<sup>1,2</sup>, indicating that the field-collected male parent of family #46 carried only one recessive allele at the cadherin locus. Sequencing of cDNA from the resistant F<sub>1</sub> progeny showed that male #46 had two transcripts of cadherin allele, which we name  $r15A$  (Figures 1, S2 and S3) and  $r15B$  (Genbank accession numbers KY814704 and KY814705, respectively).

Survivors from family #46 were reared to adults and single-pair crosses between these survivors and adults of the opposite sex from the susceptible strain APHIS-S (cadherin genotype  $ss$ ) from Arizona were conducted separately to produce resistant strain JL46. We used PCR to identify  $r1$  allele for the parents of all single-pair F<sub>2</sub> families<sup>3</sup>, and retained only the families from pairs of parents without carrying  $r1$  allele ( $r15s$ ), then these single pairs of these F<sub>2</sub> progeny were selected by exposing larvae to diet containing the diagnostic concentration of Cry1Ac. The individuals survived on the diagnostic concentration were homozygotes  $r15r15$ , which were reared their progeny as strain JL46, and feeding larvae of JL46 with diet containing the diagnostic concentration of Cry1Ac every fifth generation to maintain the resistance to Cry1Ac.

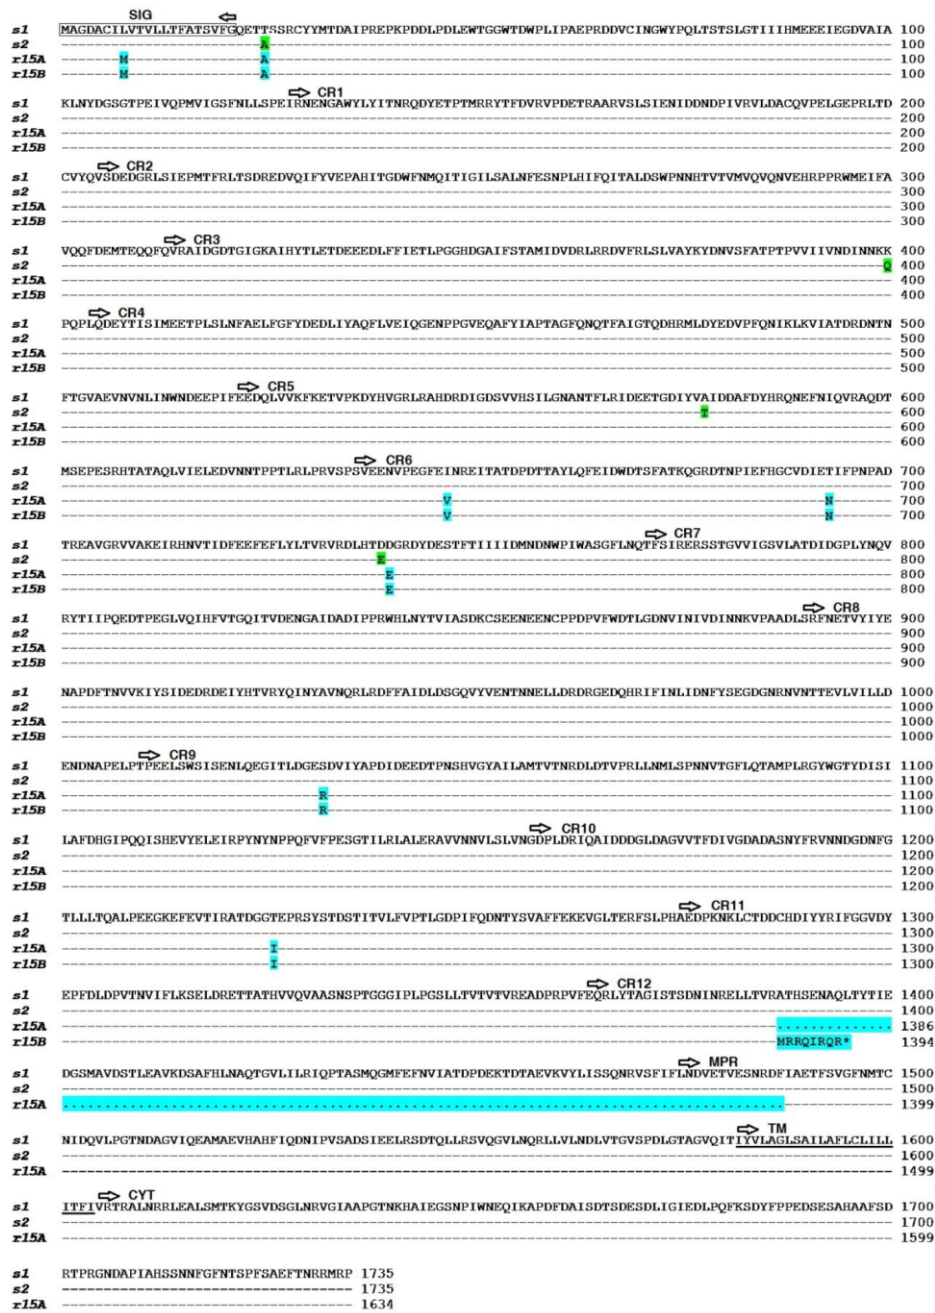

**Figure S2.** Predicted amino acid sequence of pink bollworm cadherin protein PgCad1 for alleles *s1* (GenBank accession no. AY198374) and *s2* (GenBank accession no. MF276974) from susceptible strain APHIS-S; and *r15A* (GenBank accession no. KY814704) and *r15B* (GenBank accession no. KY814705) from resistant strain JL46). The *s1* allele was sequenced in 2003 from APHIS-S reared in Arizona<sup>1</sup> and *s2* was sequenced in 2015 from the subset of APHIS-S reared in China<sup>4</sup>. Shown are the signal sequence (SIG), cadherin repeats (CR1-CR12), membrane-proximal region (MPR), transmembrane region (TM) and cytoplasmic region (CYT). The blue shading indicates differences in *r15* compared with *s1*: deletion of 101 amino acids (1387 to 1487 for *r15A*, indicated by dots) and frameshift mutation for *r15B* and seven single amino acid substitutions (L8M, T25A, I647V, T693N, D740E, S1032R, T1226I). The green shading shows differences in *s2* versus *s1*: four single amino acid substitutions.

```

#1 ATGGCGGGTACGCGTACTACTGTCGCGTCTTCTGACCTTCGCACTAGTTCGGCCAGAAACACATCTGCGAGATGTACTACTGACTGAGCTATCCGAGAGAACCGAAACGGATGATTGCTGATTGAAGTGG 150
r15A .....A.....C.....G..... 150
r15B .....C.....G..... 150

#1 ACTGGTGTATGACCGATGCGCTTTGATCCCGCGTGGCCAGAGAGACGCTGTGCATAAAGCGGTACCCCAACTCCAGCACTCTCTCGGACCATCATCCACATGGAAGGAGATCGAGGGAGTGTGCTATCGCT 300
r15A .....C..... 300
r15B .....C..... 300

#1 AAATCTAATGATGCTGCGAACCCGAAATGTCACCGGATGTTATGAGACTTTTAACTCTAGTCCAGGATCGGATGAAAGGGGGGCTGACTTATATACCAATAGGCAAGATATTAACACCAACATG 450
r15A ..... 450
r15B ..... 450

#1 CCGCGTATACATGCTGCGAGTCCGAGACGAGACTGTCGCGGAGAGTGTCTCCATCGAAGACTGCAATGAGCACTCTCTGAGGCTGAGCGCTTCCAGTCCGAGTCCGAGTCCGAGTCCGAGTCCGAGTCCGAGT 600
r15A .....C.....T..... 600
r15B .....C.....T..... 600

#1 TGCGTTTACCAAGTGTGAGAGATGGAGGCTTAGTATCGAGCCATGACATTCGCGCTCAGTACAGCCGTGAGAGCTACAGATATCTATGTGGAGCCAGCTCACTACTGGTGTGCTCAACATGCAAACTACTATCGT 750
r15A .....C.....A..... 750
r15B .....C.....A..... 750

#1 ATCTCTATGCGCTTAACTCGAAGCAACCCGCTGCACTTTCAATCACTGCTTGGATCTCGGCGCAACCATACGCTGATGCTGATGCTGATGCTGATGCTGATGCTGATGCTGATGCTGATGCTGATGCTGATGCT 900
r15A .....T.....C..... 900
r15B .....T.....C..... 900

#1 GTCACAGCTTGTGAGATGAGAGCACTTCCAGTCCGCGCCATCGAGAGACACTGGCATCGGAAAGCTATACACTATACCTCGAGAGATGAGGAGAGATTTGCTTCAACAACTCCGCGCGCATAC 1050
r15A ..... 1050
r15B ..... 1050

#1 GGAGCCATCTTACGACTGCGCATTTGATGTGATGAGCTCGGCGAGATGTCTTCAGACTTCCTCGTGGATACAGAGTACAGCAATGTCTCCGCAACCCGAGCCGCTGATCATATGCTCAATGACATCAACCAAGAAA 1200
r15A .....T.....C..... 1200
r15B .....T.....C..... 1200

#1 CCCACCGCTGCAAGTATGACAAATCCATAATGAGAGAACTCCACTGCTGCAATTTGCTGACTTTTGGTCTATGATGAGATTTGATCAGCAAACTTCTGCGAAATCAAGCGAGACCTCCGCGTAT 1350
r15A ..... 1350
r15B ..... 1350

#1 GAGCAAGCTTTTATATGCGCCACCGAGGCTTCAGAACAGACATTCGCAATAGGACTCAAGATCCGCAATGCTGATTTAGGATGCTTCTTCCAAACATCAAGCTCAAGTAAAGCAAGCCAGCCGCTGACATCAAT 1500
r15A .....G..... 1500
r15B .....G..... 1500

#1 TTACTGGATGCGGAGTCAAGCTGAACTGATTAATGAGACGAGAGGCGGATCTTGGAGAGACCACTGTTGAAATTAAGAGACTGTACCGAGACTATCACTCGGAGACTGAGGCTCAGACCGGACATA 1650
r15A .....T.....G.....G..... 1650
r15B .....T.....G.....G..... 1650

#1 GGAGCAGCTGTGCTTCACTCTGGGAAAGCAATTTGAGATCGAGAGAACTGGGACATATAGCTATGATGAGCGCTGATTCAGACAGAAATGAAATGATCAAACTCGCGCTCAGAGACC 1800
r15A .....C..... 1800
r15B .....C..... 1800

#1 ATGCGAGCGAGATCCAGCATACAGACTCTCAGCTGCTATAGACTCGAGAGCTCAACAGCACTCTCTACTGAGCTCGCTGAGTCCGCTGTGAGAGAAATGCGCAGAGGCTTGAATCAACCGGAG 1950
r15A .....G..... 1950
r15B .....G..... 1950

#1 ATACCGCGACGAGCCCTGACCCAGCATACTGCTGAAATGATGAGTGGAGCACTATCTCCACTAAACAGGGCGTATACCAATGAGTATCCAGATCGCTGATATGAGAACCTTCCCAACCGAGAC 2100
r15A .....A..... 2100
r15B .....A..... 2100

#1 ACCAGAGGCTGTGGGCGAGTGTAGCAAGGATCCCGCAAGCTGACTGATTTGAGAGTGTGAAATCTCTACTCCAGTATGAGTTCGAGCTCCAGACAGATGAGGAGATGATGAACTACCTCAGC 2250
r15A .....A.....G..... 2250
r15B .....A.....G..... 2250

#1 ATATGATATGATATGAGCAACTGCGCTATCTGGGCGTGGTCTTCTGCAAGCTCTGATTCGGAGGACTCATCTCGGCGCTGCTCATCGGCTGCTCATCGCTCAGACATGATGGCCCATTTACAGCAATC 2400
r15A .....T.....C..... 2400
r15B .....T.....C..... 2400

#1 CGTACACATATCCCGAGAGACTCCGAGGCTGATCGAGTACATCTGTCAGGGTCAATGAGTGTAGAGAAATGTCAGCTGATTCACCTGTCGACCTCACTACAGCTATATGAGCGAGC 2550
r15A .....A.....G..... 2550
r15B .....A.....G..... 2550

#1 AAATGTCGAGAAATGAGAGAACTGTCGCGGATCCAGTCTTGGGATCTCGGGCAATGTAATTAACATGCGGACATAAACAAGGTCGCGGACAGCTCAGTCCGATCAACGAAAGCTGATATTATGAA 2700
r15A .....C..... 2700
r15B .....C..... 2700

#1 AATGACCGCTTCAAAAGCTGCAAGATATATCCAGCGAGAGCAATATACAGACGCTCGGATCAGATCAATATGCTGATCAACCGGCTGAGACTTCTCCGATAGACTGATTCGCGAGCTG 2850
r15A .....T..... 2850
r15B .....T..... 2850

#1 TAGTGGAGAACCAACATGATCTCTGAGTGGAGAGGAGAGCAACAGAGATATCTAACCCTCATGCAACTTTATAGCGAGGATGAGAAATGAGAAATGAAACTACAGAGTGTGGTATCATTAAT 3000
r15A ..... 3000
r15B ..... 3000

#1 GAGATGACAACTGCTGAAATGCGACTCCAGAGAGCTGATGGAGCATTTCCGAAATTTACAGAGGATATAACTGATGGCGAAGCGATGATATACGACCGGATATAGCAAGAGAGACCGCAACTCTCACGTT 3150
r15A .....A.....A..... 3150
r15B .....A.....A..... 3150

#1 GCGTACGATCTCGGATCAGCACTCACTAGAGACTGCGACTGTCAGACTCTCAACTCTCGCTCAACAGTAAACCGGATCTCCAGAGCAATGCTTGGAGAGATATGGGGACTACGATATGATATA 3300
r15A .....T.....A..... 3300
r15B .....T.....A..... 3300

#1 CTGGGCTGACAGAGTATCTCAGAGATATCATGAGTGTATGAAATGCAATGCACTTACATTAACAATCCCGCACTGTTTCTGAAATCGGGAGATCTCAGACTGGCTTGGAGCGAGTGTGATTAAT 3450
r15A ..... 3450
r15B ..... 3450

#1 GTTTCTACTGTAAAGCTGACCGTATGAGCAGATACAGCAATGACAGAGCTGATGAGTGTGAGTGTGAGTGTGAGTGTGAGTGTGAGTGTGAGTGTGAGTGTGAGTGTGAGTGTGAGTGTGAGTGTGAG 3600
r15A ..... 3600
r15B ..... 3600

#1 ACCTTTCTGACAGCGCTCTCTGAGGAGGAGGATGAGGTTACCTCGGCTACAGCGGAGAGAGACTGATCATATTAACAGACTCCATATAAGCTCTCTGCTCCGACTTGGGTATCGGACTTT 3750
r15A .....T..... 3750
r15B .....T..... 3750

#1 CAGATAACACTTACTAGTACTCTTGAAGAGGTTGGCTTACTGAGAGTCTCGCTCCACATCAGAGAGGACTTAAAGCAAACTGCACTGAGACTGACAGATATTAACAGAGATCTTGGTGTGATGAT 3900
r15A ..... 3900
r15B ..... 3900

#1 GAGCAATTTAGCTGAGCGGCTGACAGCTGATCTCTGAAATGAGACTGAGCGGAGACTCTGACAGCTGATGCTGAGTGGAGGCGGATTTCCGCGGAGGAGGAGGAGGAGGAGGAGGAGGAGGAGGAGGAG 4050
r15A .....T..... 4050
r15B .....T..... 4050

#1 ACCTGACGTGAGAGAGGAGTCCAGCGCTGTGTGAGAGCGTGTGACAGCGCTGCAATTCACCTCCGATACATCAAGAGGAACTACTACCGTGTGCACTTCCGAAAGCGCAATGACATACCATCGAA 4200
r15A ..... 4158
r15B ..... 4158

#1 GACGGTCTATGGCGTGGACTCCACTGGAAGCGTCAAGGCTCGGCTTCCATCTAAGCGCAGACCGGCTCTCATACTAGGATACAACACTACTCCAGCATGAGGAGATGTCGAGTTCACGCTACGCTACTGATCCA 4350
r15A ..... 4158
r15B ..... 4158

#1 GATGAGAGAGAGATGCGAGAGTGAAGTCTACTTTCATCCCAAAATAGGTTGCTCTATATCTGACGATGTGGAGCGTTGAGATGAGAGAGATATCGAGAAAGCTCAGGCTTGGCTCAACATGACTTC 4500
r15A ..... 4197
r15B ..... 4197

#1 AATATAGTCAAGTCTCGCGGCAACAGCGCGGCTGATCAGAGGCAATGCGGAACTCAAGTCACTCATACAGGATACATCCCTGTGAGCGCGAGATGAGAGCTTCGAGTGCAGCTCAGCTCGCGCTCC 4650
r15A ..... 4347
r15B ..... 4657

#1 GTCAGAGTGTGAAACAGCGCTTGGGCTGAAACAGCTGAGCGGGCTCAGCTGATCGGACTCGCGGCTGCAATGACATATGCTGAGCGGGTGTGAGGACTCTGCTCTCTGCTCTATCTGCTC 4800
r15A ..... 4497
r15B ..... 4607

#1 ATCAATTCATGTGAGGCGGACTTGAACCGCTTGGAGCACTGTGATGAGAAATCGGCTCGGTGATTCGCGGCTGAGCGAGTGGGATAGCGGCCAGCAAGCAACAGCCATGAAAGCTCCAGCCCATC 4950
r15A .....C..... 4647
r15B .....C..... 4757

#1 TGGACAGAGAGTCAAGGCCCGGACTTGCATCCATGATGACACTGAGAGAGTGTGATGATGGATCGAGGATCAACCAATCAAGAGGAGCTATTTCCGCGTGGAGCTGGAAATCGGCTCAGCGGCTTTAGGAC 5100
r15A ..... 4797
r15B ..... 4907

#1 CGACCGCAGCGGAGAGTCCGCTTGCACAGTAGCACTTGGTTCACACAGCTTTTTCAGCGGAGTCACTACAGCGGAGTCACTACAGCGGAGTATGAGCAATG 5208
r15A .....C..... 4905
r15B .....C..... 5015

```

**Figure S3.** The full length cDNA sequence of pink bollworm cadherin protein PgCad1 for alleles *s1* (GenBank accession no. AY198374) from susceptible strain APHIS-S; and *r15A* (GenBank accession no. KY814704) and *r15B* (GenBank accession no. KY814705) from resistant strain JL46). The blue shading indicates differences in *r15* compared with *s1*: deletion of 303 bp for *r15A* (4159 to 4461, indicated by hyphens) and 193 bp for *r15B* (4159 to 4351, indicated by hyphens).

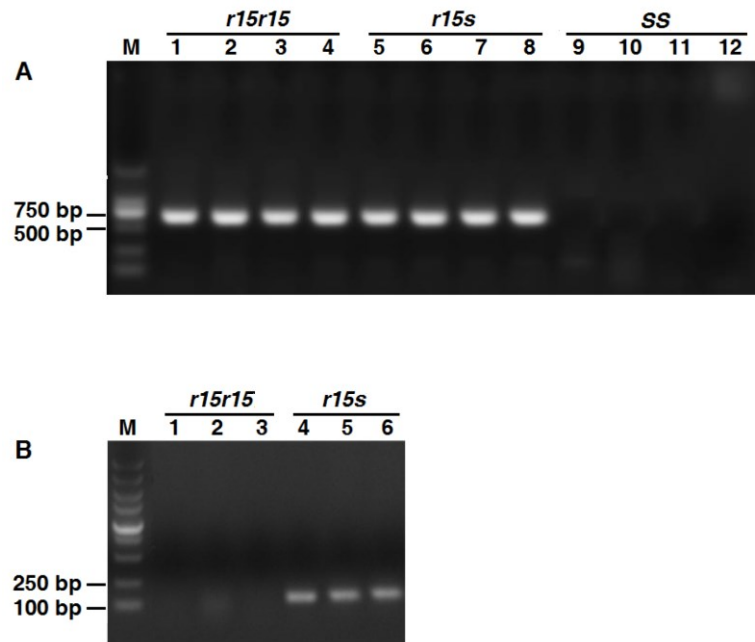

**Figure S4.** PCR detection of *PgCad1* genotype using primers in Table S1. (A) Primers for *r15* (*r15F* and *r15allR1*) generate a single band of 652 bp in *r15r15* from JL46 (lanes 1-4) and in *r15s* ( $F_1$  progeny of APHIS-S  $\times$  JL46; lanes 5-8); and no band in *ss* from APHIS-S (lanes 9-12). (B) Primers for *s* (*notr15F* and *r15allR2*) generate no band from *r15r15* (lanes 1-3) and a single band of 152 bp from *r15s* (lanes 4-6).

**CAGGGAACACTACTACCGGTCGT** GTAAGTTCCTCTCTCTCTCTCTATTTAAGAGCTCGCGCTTGTGCGTGGAGTAATCGCCATTCTCTCTCTCCGCCAAAACCTCACCTCCCGA 120  
TACGACACGACCTGCACCTTCTCTTTATTTGTTTCAATAATGTTACTAGGTCTAGGTCCTCTCTCCCTTAAATTTTTCTCTATGATGTTGTTATAAAGAAATCGTGTC 240  
GTATCAGGTGGCCCAATCATATTTCTCTCCGGTCTCTATAGTATCTTCAACTCTTCCAGTACTTTTCATTGACACCATTTCCGTCACGCTTTTACTTATTAATGATTAATAA 360  
TAAAAAACCCCTCTCTACCCCTCTCTCTCCCTCAATTTTCTCTCTATAATGTTGTTATAAATAAAGTGGTATCAAGTCTACTTTATTTGACCATATTCATTAGCTCC 480  
GACCATTTTACAGGGGCAATTAACCAAGAAATGAATGAATAAAGATGAGTATTTTCCGCAATAAATAAAGAAATGTTGTTGAAATCCGAAACAGACAGAATAGTAAAA 600  
ATAAGTTTACCAAAAGCAATCATCAATTTGAAAAATAATGAATCAAGATATAAAAAATGTTGATTTGGATAAAAAATAAAGAAATAAAGGACACTAAAAAGGAAATAAAGTCTA 720  
CAAGTAAATGTTACTTACCTACCTATCACTTTTATGTAAGCCCTCATCATCAATTTAAGAGCCACGCTTGTGCGGTGAGCATTTCCATCCAGTCTATCAAAAGCCAAATC 840  
CTTGACTTCCCTATAAGACAGACGTTAACATTTTCTTAATCTGTCCATGTAAGCTCTCTTGGTCTTCCCTTCTCCCTTTCCTCTAGCTTCTCTATGATGTTTTATAA 960  
TTGCTGCTGTCAAAATTTGAAGCCCTATGCTATAGTTTTTGTCTTAGTAGGATTTTGTGCTCATCACCTTTTGTCTGATCGCATTTACCATTTAATTTAAGCTTTTATAAATTC 1080  
CCTACCAACGACTGTCCTTCAAATCACTACAAACCGATTCTTGTATCGAGCACTTCCGAAAACCGCAATTTGACATATGGGCTATATTTATTTGGGTCGCATAACCTGTC 1200  
TCTCACGTTCAAACACGATTTTTATAAAGCAAAACATTTTTTAAAAATAATTACACTATGGTACATTAAGTATGATGTTTTATACTCGTGTCTTATAATCCAGTTTTTATCAAATTAAT 1320  
TGAATTTAACCAAAAACAGCGTAACCTAAGTTGACTTTTGTAGTAACCGAGTGTTCCTCAAAAATTCGACTGTCCTCATATAATTTACTCCATATAAACACACATTACTTAAAAAC 1440  
TCTTCAAAGCGCTATTAATAATTAATTTTGGCGTAATAACACGTAATTTAACTTTTAACTTTAACTTTAACTTTAACTTTAACTTTAACTTTAACTTTAACTTTAACTTTAACTTT 1560  
TGTCCCGCGGCAAAACGAAAAATACGAAACACTATGTTACCATACGAAACCTGAGTCTTAAATTTAGAAATTTGATGACATTTGCGCCAAAAGTCGATAACATATAATCAAATATTATT 1680  
GGGGCGCGGGGAGTGCCTGGCTTTGAAATTCGCGGAGTCACTCGCGAGGACGCGCGGAGTAGGTGCGTATTAAATGGGAGACCGCTGAGTACCCGCTGTGATAGGTGAGTTTT 1800  
TGAATTTGAATAATCTTTACGTTATCTTTAAAAAAGGAGCAAAATTTATTGACACCATCTGTTTTATAAAAATAAATACCATATGAGTGTATTTTGAATAACACGTTGGTTTT 1920  
TACAACGTGAGTTACCGATGCTCTGGCTTACTTGGGAAATGTAACGCAAGTTGAGCCAGTCTAAAGCAATTTGCTCAATTTTACAAAATTTAATAGTAAAAAT 2040  
AGTTTAAATTAATAATTTTCTGTACAGAGTGTGCGAGTTTATCGTCCCAAGTCCCTAGTCAACACGCTGTTGACCATCGGTAGTGTTCGAGCAGGGTAGCGTCTGATCTCAGAA 2160  
ATCATCTCGATATTTGCTGACTGTATCCAGGTATACGCTCCGACCTCGGACACCCAGTGAACGAAAGTGGAGACTATGATGGAAGATTTCTAAAGCCATGCAATAGCCATAAAAGCCA 2280  
CTACACGATTTGATGGGGGACTTTAATGCACAGTTGGGGAAGCCTTGGCGTACGAGCTGAGAGTAGGGCAATTTGGATTTGGGGTTTGGAAACCCAGAGCCGGAATGCTGGCGGACTT 2400  
TATGGAGAAGAAGAACTCTATATGATGAACCTCTTTCAGAAAGCCCGCACCCGCAATGGACCTGAATAAGTCCAGTGGAAATATAAAAAAGCAGATGATTTTATCATGTGAGC 2520  
AAAAAGCACAATTAATGATGCTCTGTGATCAATGCCGTTAAGACGGAAGCAACGAAACGGGTTTCCGAAAGGCTTTAGCACCATAGCCACATCCATACGATCGCGGAGTTATA 2640  
CAGAAGCCGGAAGATATACTGCCACTTGGCTTGGCGTTGTGGACTATGAGAAAGCCTTTGATTCGATCGAGACCTGGCGGTTTGCAGTCTCTTACAGAGTTCGCAAGTGAACACT 2760  
AGGTACATCGAAGTCTAAGGACCTCTACCAAAATGACACTATGTCAAGTTCGGAACAGAACGAGCTCTAATCCGATCCAAGTCCAGCGAGGAGTGAACAGGGAGATGTTATCTCT 2880  
CCGAACCTGTTCACTGCTGCATTTGAGGATATTTTAAAGCTTGTGACTGGAAAGGATTTGGCATCAACATCAACGGCAGTACCTGACGCCCTTCTGATTTCCGATGATATAGTCTC 3000  
ATGGCTGAGACCTGGAGACCTGGAACACATGCTCGAGCATCTCAGTAACGGATCCCAATGAGTGGGTCTTAGCAGGAACATGGCAAAAGCAAAAATATGATCCAAAGACCATGTCGCA 3120  
CCCACTCCAGTTCAGTTGGGAACTGACACTCGAAGTTGAGACCAAGTATTTACTAGGACAAATAAATCCAGTTAGGTAAGTCCCACTCTCGAAGAAAGAGATCTCTGCTGGATCCAA 3240  
CTCGGATGGGACGCTTGGGAACTGCGGAAATCTTCTCGTCCAAAATACCTCAGTGTCTCAAGGAAAGTCTTTGACCAGTGCCTTTGACCAGTGAATTTACAAAATTTAATAGTAAAAAT 3360  
TGGCGCTTACTATGGTCTCGTGAAGAGGCTCGGTGTGCTCAGCGGGCAATGGAGAGAGCTATGCTCGGATTTTCCCTGCTCGATCAAAATCAGAAATGAGGAGATCCGGCAGGAGAACT 3480  
AAAGTACCGACATAGCTCGGCAAAATGCAAAAGTGAAGTGGCAGTGGGACAGACATAGCGAGGAAACCGGTGAAGTTCGCGGAAAGCCGCTGGATCGCGGACGAGCAGCCGACT 3600  
GTCCTGGAGATCTTGGGGAGGCTATGCCACGAGTGGGCGCTGTAAGGCTGTAGAGCATGATGACATACATACATAAATAAAGTCAATGATGATGATGATGATGATGATGATGATGAT 3720  
TAGAATCCATTTGCTGAAAACGAATTTGAATGAATTTGATGCTCCATTAATAATATTTGACTCAGACAGAACTAATGATGATTAATTTGAGAAAGTTTGGATTTATTTTT 3840  
ATTTAAGAGATTTGTTTAAATTTGTTATGTTTCAATTTAATTTGATTTCTGTTTTTAAATGTTTTCAGTAAAGTAAACACCATAGATGCGGAAAGT(TTACCATTATGTTACTTAC)TAA 3960  
ACTATGCGTATCTTTTTGTCGCCCATTTTTATGGAGACTTTTCAGACTTAGAACTAAAACTACCTAAGTATATTTAAAAATTTTGAATTTTATGATTTTAAATATATAAATG 4080  
ACCTCCATAAATAAATAATGCTGAACTGCTATTGTTTCTATTTTAAAAAAGTTTATCTCAATAAATAAATAAATAGGTAACGAAAGTGAACCTAACCAATAAATAAAGTATTA 4200  
TGAATGTTTTCGTGATTTAATAATAAAGTCAAAAATCTTTATCTTAATTTAAAAAAGAAAGTTTGAATTTAATGTAACGTTCCCAATAAATAAATAAATAAATAAATAAATAA 4320  
ACACAGTTGTTGTTTTCTGCCACCTCCCTAGTATAAATAAATAAATAAATAAATAAATAAATAAATAAATAAATAAATAAATAAATAAATAAATAAATAAATAAATAAATAA 4440  
AGTAAGAAATATTAACAAACAATAGCATAAATAAATAAATAAATAAATAAATAAATAAATAAATAAATAAATAAATAAATAAATAAATAAATAAATAAATAAATAAATAA 4560  
TGGACTCCACTCTGGAAGCCCTCAAGACTCGGCTCCATCTGAACCGCAGACCCGGCTCTCATACTGAGGATACAACCTACTGCCAGCATGCGAGGCTGTCGAGTTCAACGCTCA 4680  
TCGCTACTGATCCAGTAAATGGGGCACAGCTACGCAAGGACTTTGAGCAAGGGGTAACAGTGTGTTGTAATAAAGGGGATGATCGGCTCCTCACACTGAGGATACAGTCAACAGGA 4800  
TTTTGTTCCACGTCATCAGTGATTCAGAGAGGCGTGCCTATAGAATCATAACATAAACAACGCTATATACGTCCTGCTGGGACAGGCTCCCTCAATCAACCGGAGG 4920  
GGTATGGAGTACTCCAGCTCAATGCGGGTGGTGGAGGTTTACAGTTTGTAGAACGCTTGCCTCTCCTTTGAGTGCAGGTTGCAATCCAGCACAGGCTAAACCAA 5040  
TTATTTGCGAATTTGTTTTCGAATTTATGTTTGGATCATAAATGATATCACGTGCTCAACAAAACATCTGAGGAAACCCGAGAAATGCATTTCCGAAAGGATGTGACCTAACCTGTA 5160  
TTGGGCTGGTTTTCCCTGGTGGAAAGTGAAGCATGCTGCTTACCTTTCGCTCTTTAAAAACCGGACTGTGCAATCTTCAGGTTAGGCAAGCGGACCTGTGAAATACGGATTAAG 5280  
GCTAGGGAGATGATGATGATGAGTCACTTCAAAGTTTTTAAACAAAAGGATTGGATTCCGATTCTGTAATGTAATAATAGACCTCTGTAACATAAATAGCCACATAGCTAGGTGATCAAG 5400  
GAACCAAGCAATACTTACTACCTTATTCAAGATTAATTTCTGAAGAAATGAAAAATTTCCAAACACAAAATAACAGTGAATCTTTTATTTATTTCTTACTTTCCAGATGAGAAAGC 5520  
AGATACCGCAGAGTGAAGCTACCTCAATTTCACTCCAAAATAGGGTCTCTCATATTTCTGAACGATGTTGGAGACGGT 5601

**Figure S5.** Sequences of the three nested TEs inserted into Exon 28 of r15 gDNA sequence. Blue=MITE-1\_PGo, Green=RTE-5\_PGo, Gray=SINE-1\_PGo. TSD= italic and underlined letters. TIR=underlined letters. Microsatellite repeats of (AYG)<sub>4</sub>(ACAT)<sub>4</sub> for RTE-5\_PGo and of (TTAY)<sub>4</sub> for SINE-1\_PGo are indicated with a pair of parentheses.



Range 1: 1719 to 2714 [Graphics](#) [Next Match](#) [Previous Match](#)

Alignment statistics for match #1

| Score         | Expect                                                       | Identities                     | Gaps        | Strand    |
|---------------|--------------------------------------------------------------|--------------------------------|-------------|-----------|
| 672 bits(744) | 0.0                                                          | 750/1001(75%)                  | 28/1001(2%) | Plus/Plus |
| Query 634     | CGAACGACGGGTTCCGAAAAGGCTT                                    | AGCACCATGACACACATCATAGATGCGGCA |             | 693       |
| Sbjct 1719    | CGAACGACGGGTTCCGAAAAGGCTATAGTACCGTAGACACACATACATACGCTGCGCCA  |                                | 1778        |           |
| Query 694     | GTTTATACAGAACCCGAGAGTATAATCTGCCACTTTCCTGGCGTTTGTGGACTATGA    |                                | 753         |           |
| Sbjct 1779    | GGTTATACAGAACCCGAGAGTATAACTTGGCCCTCTCTAGCGTTTGTGGACTACGA     |                                | 1838        |           |
| Query 754     | GAAAGCCTTGTATCGATCGAGACTGGGCGGTGGCAGTCTCTCAGAGGTGCCAAGT      |                                | 813         |           |
| Sbjct 1839    | AAAAGCCTTGTATCGGTGAAACATGGCGGTACTGGAGTCTCTCCAGCGATGCCATAT    |                                | 1898        |           |
| Query 814     | GGACCATAGTACATCGAAGTCTAAGGACCTCTACAAAATGACACTATGTCAGTTGG     |                                | 873         |           |
| Sbjct 1899    | TGACTATCGGTATATCGAAGTCTGAAAGTATTGTATAGAAAACGCCACTATGTCGGTCCG |                                | 1958        |           |
| Query 874     | AGAAGCAGAACGAGCTCTAATCCGATCCACTGACGAGGAGTGAGACAGGAGATGG      |                                | 933         |           |
| Sbjct 1959    | ACTTCAGAAAACAGGTTTCGAGGCGGATCCCTTAAAAGAGGCGTAAAGACAGGAGAGCTG |                                | 2018        |           |
| Query 934     | TATCTCTCCGAACTGTCACTGCGATGGAGGATATTTTAAAGCTCTGAGCTGGAA       |                                | 993         |           |
| Sbjct 2019    | CATATCTCCGAACTGTCACTGCGCGCTTGGAAAGCGCTCAAGCTCTTGGAAATGGGA    |                                | 2078        |           |
| Query 994     | AGGATTTGGCATCAACATCAACGGCGAGTACTGACGACCTTCGATTTGCCGATGATAT   |                                | 1053        |           |
| Sbjct 2079    | AGGACTGGCATCAATTAACGGCGAATACATTACTACCTTCGTTCCGCGCAGATAT      |                                | 2138        |           |
| Query 1054    | AGTCCTAATGCTGAGACCTGGAGACCTGAACACATGCTCGAGCATCTCAGTAACCG     |                                | 1113        |           |
| Sbjct 2139    | CGTAGCTAGGCAAGTGGATGGAGACTCAGTACGATGCTCGAAGGCTCAATCGAGT      |                                | 2198        |           |
| Query 1114    | ATCCCAATGAGTGGGTCTTAGCACGAACATGGCAAGACAAAATATATGTCATGACCA    |                                | 1173        |           |
| Sbjct 2199    | CTCCACAGGCTAGCTTAAATGAAAGCGGCAAGACGAACTCATGTCTAATGTCCA       |                                | 2258        |           |
| Query 1174    | TGTCCACCCCTCCAGTTCAGGTGGGAAAGTTACACTCGAAGTTGTAGACAGTATAT     |                                | 1233        |           |
| Sbjct 2259    | TGTCCACCCCTCCAGTTCAGGTGGGAAAGTTACACTCGAAGTTGTAGACAGTATAT     |                                | 2318        |           |
| Query 1234    | TTACCTAGGACAAATAATCCAGTTAGGTAAAGTCCAACTTCGAAAAGAGATCTCTCGTGG |                                | 1293        |           |
| Sbjct 2319    | ATACCTGGACAGACAGTCCAGTTAGGAAGTCCAACTTCGAAAAGAGGTCAATGCGCG    |                                | 2378        |           |
| Query 1294    | GATCCAACTCGATGGGACGCTTGGGAAAGTTCGGAATATCTCTGTCGCAAAATACC     |                                | 1353        |           |
| Sbjct 2379    | AATCCAGCTCGATGGGACGCTTGGGAAAGTTCGGAATATCTCTGTCGCAAAATACC     |                                | 2438        |           |
| Query 1354    | TCAGTCTCTCAAGAGAAAGTCTTTGACAGTGGCTGTCCAGTGTGATGATCTACGGGAG   |                                | 1413        |           |
| Sbjct 2439    | TCAGTCTCTCAAGAGAAAGTCTTTGACAGTGGCTGTCCAGTGTGATGATCTACGGGAG   |                                | 2498        |           |
| Query 1414    | TGACAGTGGCGGCTT-ACTATGGTCTCTGAGGAGGCTCGGTGCTCGCTCAGCGGCAA    |                                | 1472        |           |
| Sbjct 2499    | CGAAACGTGG-TGCTTCCACAAAGGGCTTATGAACAGACTCAGAGTCTCAAGAGCTA    |                                | 2557        |           |
| Query 1473    | TGG-----AGA-----GAGCTATGCTGGTATTTCCCTGCTCGATCAATCA           |                                | 1514        |           |
| Sbjct 2558    | TGGCTCTCCATATCTCCGGCTCTAGTATGCTCGGAGTTTCTTACGGGATCGAATCA     |                                | 2617        |           |
| Query 1515    | GAAATGAGGATCCCGAGGAGAACTAAAGTACCAGACATAGCTCGGCAAAATGCAAGC    |                                | 1574        |           |
| Sbjct 2618    | GAAATGATGAGATACGTAGAAGAACGAGAGTACCAGACATAGCT---AAACGGATTAGC  |                                | 2673        |           |
| Query 1575    | ---TGAAGTGGCAGTGGGACGACATAGCGAGGAGAAC                        |                                | 1611        |           |
| Sbjct 2674    | TCTTTGAGTGGCAGTGGGACGATCATATAGCCCGGAGAAC                     |                                | 2714        |           |

Range 2: 361 to 731 [Graphics](#) [Next Match](#) [Previous Match](#) [First Match](#)

Alignment statistics for match #2

| Score         | Expect                                                      | Identities   | Gaps      | Strand    |
|---------------|-------------------------------------------------------------|--------------|-----------|-----------|
| 163 bits(180) | 3e-43                                                       | 265/374(71%) | 7/374(1%) | Plus/Plus |
| Query 243     | GTCATCCAGGTATACGCTCCGACCTGGGACACCACGATGACGAAAGTGGAGACTATGAT |              | 302       |           |
| Sbjct 361     | GTCGTTCAAGTATATGGCCGACTTCGTCACACAGATGAGGAAAGTGGAGTCTATGAT   |              | 420       |           |
| Query 303     | GTTGAGATTTTAAGCCATGATGATGATGATGATGATGATGATGATGATGATGATGAT   |              | 362       |           |
| Sbjct 421     | GAGGACATTAGTAGGGCCATACACTAGCAAACTCACTCAATGTTGTTATGGGAGAC    |              | 480       |           |
| Query 363     | TTAATGCACAGTTGGGAAAGCTTCCGTAACGAGCTGAGAGTGGGCAATTTGGATT     |              | 422       |           |
| Sbjct 481     | TTAATGCAGAGCTAGGCAAGAGGCTTACGAGTTGAAAGTGGGCAATTTGGGCAAT     |              | 540       |           |
| Query 423     | GGGTTTGAACACAGAGCCGATGCTGGCGGACTTTATGGAG-AGAAGAACTCTA       |              | 481       |           |
| Sbjct 541     | GGCAACGGAACTTAGAGGACAGAGGCTGGCGGATTTCTGGAGAAAGAGGAC-TCTT    |              | 599       |           |
| Query 482     | TATGATGAATCTCTTCCAGAAAGCCGAC-CCGAAATGGACCTGAATAAGTCCAG      |              | 540       |           |
| Sbjct 600     | TGTGATGAATCTCTTCCAGAAAGCCGACTCAGCAAAATGGACTGGATGAGGCCGA     |              | 659       |           |
| Query 541     | TGGAATTTAATAAAGCAGATCGATTATCATGTGACGA-AAAAG-CACATATCAAT     |              | 598       |           |
| Sbjct 660     | TGTTCCACGAAATGAGATAGACTCATATAGC--CGTAGAGACGAAATATTCAT       |              | 717       |           |
| Query 599     | GATGCTCTGTGAT                                               | 612          |           |           |
| Sbjct 718     | GATGCTCAAGTAT                                               | 731          |           |           |

**Figure S6.** Nucleotide sequence alignment between RTE-5\_PGo and RTE-5\_DPI. Query=RTE-5\_PGo, Sbjct = RTE-5\_DPI.

Range 1: 436 to 770 [Graphics](#) [Next Match](#) [Previous Match](#)

Alignment statistics for match #1

| Score          | Expect                                                       | Method                       | Identities   | Positives    | Gaps       |
|----------------|--------------------------------------------------------------|------------------------------|--------------|--------------|------------|
| 516 bits(1328) | 0.0                                                          | Compositional matrix adjust. | 249/336(74%) | 287/336(85%) | 14/336(4%) |
| Query 100      | ERTGFRKGFSTIDHIHTMRQVIQKTEEYNLPLCLAFVDYEKAFDSIETWAVLQSLQRCQV |                              |              |              | 159        |
| Sbjct 436      | E+ GFRKG+ST+DHIHT+RQVIQKTEEYNLPLCLAFVDYEKAFDS+ETWAVL+SLQRC + |                              |              |              | 495        |
| Query 160      | DHRYIEVLRDLYQNDTMSVREQNQSSNPIQLQRGVRQGDGISPFLFTAALEDIFKLLDVK |                              |              |              | 219        |
| Sbjct 496      | D+RYIEVL+ LY+N TMSVR Q QSS I L+RGVRQGD ISPFLFTAALED FKLL+W+  |                              |              |              | 555        |
| Query 220      | GFGININGEYLTHLRFADDIVLMAETLEDLNTMLEHLSNASQMA-----KTKIMSNDH   |                              |              |              | 272        |
| Sbjct 556      | G GININGEY+THLRFADDIV+MA+++E+L+TMLE L+ SQ KTK+MSN H          |                              |              |              | 615        |
| Query 273      | VAPTPVQVGNVTLEVDQYIYLGQIIQLGKSNFEKEISRRIQLGWAAFGLRNIFSSKIP   |                              |              |              | 332        |
| Sbjct 616      | VAPTPV V N LEVVD Y+YLGQ +QLG+SNFEKE++RRIQLGWAAFGLRN+FSSKIP   |                              |              |              | 675        |
| Query 333      | QCLKRKVFDQCVLPVMIYGETWPLTMGLVRRRLGVAQRAM-----ERAMLGISLLDQIR  |                              |              |              | 386        |
| Sbjct 676      | QCLK KVF+QCVLPVM YGETW T GL+ RL VAQRAM AMLG+SL D+IR          |                              |              |              | 735        |
| Query 387      | NEEIRRRTKVTDIARQIAKLKQWAGHIARRTGEGR                          |                              | 422          |              |            |
| Sbjct 736      | N+EIRRRT+VTDIA++I+ LKWQWAGHIARRT +GR                         |                              | 770          |              |            |

Range 2: 1 to 114 [Graphics](#) [Next Match](#) [Previous Match](#) [First Match](#)

Alignment statistics for match #2

| Score         | Expect                                                     | Method                       | Identities  | Positives   | Gaps        |
|---------------|------------------------------------------------------------|------------------------------|-------------|-------------|-------------|
| 114 bits(285) | 3e-31                                                      | Compositional matrix adjust. | 57/114(50%) | 78/114(68%) | 14/114(12%) |
| Query 1       | MYVEISKAMHSHKSHYTIVMGDFNAQLGKRCGNELRVQFGFGVWNTGRMLADFMEKKN |                              |             |             | 60          |
| Sbjct 1       | MY +IS+A+H+ K+H+ +VMGDFNA+LGKR EL+VG FG G N RG+ LADF+EK+   |                              |             |             | 60          |
| Query 61      | FYMNSSFRRKPAPAN----GPE-----MSTKKHIFNDVSVINAVKTESE          |                              |             | 100         |             |
| Sbjct 61      | ++MNSFF+KP+ P+ M+ K+ IFNDVSVI+ VKT S+                      |                              |             |             | 114         |

**Figure S7.** Amino acid sequence alignment between RTE-5\_PGo and RTE-5\_DPI. Query=RTE-5\_PGo, Sbjct = RT-5\_DPI. Range 2 is the EP domain. Range 1 is the RT domain.



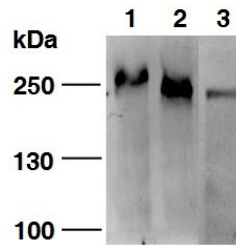

**Figure S8.** Western blot of cadherin fusion proteins sPgCad1-GFP (lane 1) and r15APgCad1-GFP (lane 2) and r15BPgCad1-GFP (lane 3) produced in Hi5 cells transfected with vectors containing the *s* and *r15A* and *r15B* alleles, respectively.

1. Morin, S. *et al.* Three cadherin alleles associated with resistance to *Bacillus thuringiensis* in pink bollworm. *Proc Natl Acad Sci U S A* **100**, 5004-5009 (2003).
2. Tabashnik, B. E. *et al.* Sustained susceptibility of pink bollworm to Bt cotton in the United States. *GM Crops & Food* **3**, 194-200 (2012).
3. Morin, S. *et al.* DNA-based detection of Bt resistance alleles in pink bollworm. *Insect Biochem Mol Biol* **34**, 1225-1233 (2004).
4. Wang, L. *et al.* Resistance to *Bacillus thuringiensis* linked with a cadherin transmembrane mutation affecting cellular trafficking in pink bollworm from China. *Insect Biochem Mol Biol* **94**, 28-35 (2018).
