# Supplementary material for: Transposon insertion causes cadherin mis-splicing and confers resistance to Bt cotton in pink bollworm from China
Source: PubMed Central journal article supplement (PMC6522560; doi:10.1038/s41598-019-43889-x), 2019-05-16
Supplement: 41598_2019_43889_MOESM2_ESM.pdf [file 41598_2019_43889_MOESM2_ESM.pdf]

**Transposon insertion causes cadherin mis-splicing and confers  
resistance to Bt cotton in pink bollworm from China**

**Supplementary Tables S1-S5**

Ling Wang<sup>1,2</sup>, Jintao Wang<sup>1,3</sup>, Yuemin Ma<sup>4</sup>, Peng Wan<sup>1</sup>, Kaiyu Liu<sup>4</sup>, Shengbo Cong<sup>1</sup>,  
Yutao Xiao<sup>5</sup>, Dong Xu<sup>1</sup>, Kongming Wu<sup>2\*</sup>, Jeffrey A. Fabrick<sup>6</sup>, Xianchun Li<sup>7</sup> & Bruce  
E. Tabashnik<sup>7</sup>

<sup>1</sup>Key Laboratory of Integrated Pest Management On Crops in Central China, Ministry of Agriculture, Hubei Key Laboratory of Crop Disease, Insect Pests and Weeds Control, Institute of Plant Protection and Soil Fertility, Hubei Academy of Agricultural Sciences, Wuhan 430064, China. <sup>2</sup>State Key Laboratory for Biology of Plant Diseases and Insect Pests, Institute of Plant Protection, Chinese Academy of Agricultural Sciences, Beijing 100193, China. <sup>3</sup>Hubei Insect Resources Utilization and Sustainable Pest Management Key Laboratory, Huazhong Agricultural University, Wuhan 430070, China. <sup>4</sup>School of Life Science, Central China Normal University, Wuhan, 430079, China. <sup>5</sup>Agricultural Genomics Institute at Shenzhen, Chinese Academy of Agricultural Sciences, Shenzhen, 518120, China. <sup>6</sup>USDA, ARS, U.S. Arid Land Agricultural Research Center, Maricopa, Arizona 85138, USA. <sup>7</sup>Department of Entomology, University of Arizona, Tucson, Arizona 85721, USA.

\* Correspondence and requests for materials should be addressed to K.W. (E-mail address: [kmwu@ippcaas.cn](mailto:kmwu@ippcaas.cn))

**Table S1.** Primers used for cloning and genotyping of *PgCad1*

| Name <sup>a</sup> | Primer sequence (5' -3')                              | Template | Strain  | Size (bp) |
|-------------------|-------------------------------------------------------|----------|---------|-----------|
| F1                | CATACTGGTGACGGTGCTTCT                                 | cDNA     | APHIS-S | 2384      |
| R1                | GGACTTGGTTGTAAAGTGGGC                                 |          | JL46    | 2384      |
| F2                | GACCTTCAGTATTCGGGAGCG                                 | cDNA     | APHIS-S | 2890      |
| R2                | CATGCGCCTGTTAGTGAACTC                                 |          | JL46    | 2587/2697 |
| gF46              | CAGGGA <del>ACTACT</del> CACCGTTCGT                   | gDNA     | APHIS-S | 2223      |
| gR46              | ACCGTCTCCACATCGTTCAGGA                                |          | JL46    | 5601      |
| <i>r15F</i>       | GCAACTCATTCCGAAAACGC                                  | gDNA     | APHIS-S | None      |
| <i>r15allR1</i>   | GAGTCCACCGCCATAGAACC                                  |          | JL46    | 652       |
| <i>notr15F</i>    | GTCCAAGGTGTGTTGAACCA                                  | gDNA     | APHIS-S | 152       |
| <i>r15allR2</i>   | ATGCTGGCAGTAGGTTGTATCC                                |          | JL46    | None      |
| PgCADF            | CCGGAATTCGCCACCATGGCGGGTGA<br>CGCCTGCAT               | cDNA     | APHIS-S | 5205      |
| PgCADR1           | TCCCCGCGGACCGCCTCCGCCACCG<br>CCTGGTCGCATGCGCCTGTTAGTG | cDNA     | JL46    | 4902      |
| PgCADR2           | TCCCCGCGGACCGCCTCCGCCACCG<br>CCCCTCTGCCGTATCTGTCTTCTC | cDNA     | JL46    | 4182      |

<sup>a</sup>F indicates forward and R reverse.

**Table S2.** The CENSOR search hits of RTE-5\_PGo against the Repbase

| Name      | From | To   | Name      | From | To   | Class      | Dir | Sim    | Pos/Mm:Ts | Score |
|-----------|------|------|-----------|------|------|------------|-----|--------|-----------|-------|
| RTE-5_PGo | 130  | 633  | RTE-4_PPo | 431  | 935  | NonLTR/RTE | d   | 0.7628 | 1.9298    | 2197  |
| RTE-5_PGo | 634  | 1616 | RTE-5_DPI | 1719 | 2719 | NonLTR/RTE | d   | 0.7652 | 1.7578    | 4520  |

**Table S3.** Responses to Cry2Ab of pink bollworm larvae from a resistant strain (JL46) and a susceptible strain (APHIS-S)

| Strain  | Slope (SE) <sup>a</sup> | LC <sub>50</sub> (95% FL) <sup>b</sup> | RR <sup>c</sup> |
|---------|-------------------------|----------------------------------------|-----------------|
| APHIS-S | 2.7 (0.3)               | 0.157 (0.13-0.19)                      |                 |
| JL46    | 1.8 (0.2)               | 0.203 (0.16-0.25)                      | 1.3             |

<sup>a</sup>Slope of the concentration-mortality line with its standard error in parentheses.

<sup>b</sup>Concentration killing 50% with 95% fiducial limits in parentheses, in µg Cry2Ab per ml diet.

<sup>c</sup>Resistance ratio, the LC<sub>50</sub> for JL46 divided by the LC<sub>50</sub> for APHIS-S.

**Table S4.** Genetic linkage between resistance to Cry1Ac and cadherin gene *PgCad1*

| Backcross family | Larvae with <i>r15r15</i> (%) |             |
|------------------|-------------------------------|-------------|
|                  | Control diet                  | Cry1Ac diet |
| 1                | 47                            | 100         |
| 2                | 53                            | 100         |
| 3                | 43                            | 100         |
| 4                | 53                            | 100         |
| 5                | 48                            | 100         |
| Mean             | 49                            | 100         |

PCR (Figure S4) was used to determine the genotype for a total of 258 larvae: 153 on control diet (30, 32, 30, 30 and 31 from backcross families 1-5, respectively) and 105 on diet treated with the diagnostic concentration of Cry1Ac (20, 24, 20, 20 and 21 from backcross families 1-5, respectively).

**Table S5.** Survival of JL46 and APHIS-S larvae on Bt cotton and non-Bt cotton

| Insect strain | Cotton type | Bolls | Entry holes per boll | Survivors/boll | Survival(%) <sup>a</sup> | Relative survival (%) <sup>b</sup> |
|---------------|-------------|-------|----------------------|----------------|--------------------------|------------------------------------|
| JL46          | Bt          | 30    | 6.7 (0.1)            | 0.9 (0.0)      | 13.0 (0.5)               | 48.0 (2.0)                         |
| APHIS-S       | Bt          | 35    | 5.6 (0.1)            | 0.0 (0.0)      | 0.0 (0.0)                | 0.0 (0.0)                          |
| JL46          | Non-Bt      | 39    | 6.3 (0.1)            | 1.7 (0.1)      | 27.1 (1.1)               |                                    |
| APHIS-S       | Non-Bt      | 43    | 5.5 (0.2)            | 1.7 (0.1)      | 31.1 (0.9)               |                                    |

Values are means with their standard errors in parentheses.

<sup>a</sup>Larvae surviving per boll divided by entry holes per boll multiplied by 100%.

<sup>b</sup>Survival on Bt cotton divided by survival on non-Bt cotton.
